# Supplementary material for: Small-angle X-ray scattering study of the kinetics of light-dark transition in a LOV protein
Source: PubMed Central journal article supplement (PMC6047819; doi:10.1371/journal.pone.0200746), 2018-07-16
Supplement: pone.0200746.s005.pdf [file pone.0200746.s005.pdf]

S1 Table: X-ray crystal data collection and refinement statistics of PpSB1-R61H/R66I-LOV.

| <b>X ray data</b>                               | <b>PpSB1-LOV-R61H/R66I (PDB ID: 6GG9)</b>          |
|-------------------------------------------------|----------------------------------------------------|
| Beamline/Detector                               | ID29, ESRF (Grenoble, France)/DECTRIS PILATUS 6M-F |
| Wavelength (Å)/Monochromator                    | $\lambda=0.9772$ /Silicon (1 1 1) channel-cut      |
| Resolution range (Å)                            | 48.45 - 2.04 (2.10 - 2.04) <sup>x1</sup>           |
| Space group                                     | C 1 2 1                                            |
| Unit cell a, b, c (Å), $\alpha=\gamma=90^\circ$ | 102.7 76.51 83.28 106.23°                          |
| Total reflections                               | 172136 (13667) <sup>x1</sup>                       |
| Unique reflections                              | 39334 (3076) <sup>x1</sup>                         |
| Multiplicity                                    | 4.4 (4.4) <sup>x1</sup>                            |
| Completeness (%)                                | 99.5 (99.7) <sup>x1</sup>                          |
| Mean I/sigma(I)                                 | 11.2 (1.7) <sup>x1</sup>                           |
| Wilson B-factor (Å <sup>2</sup> )               | 37.5                                               |
| R-merge                                         | 0.069 (0.914) <sup>x1</sup>                        |
| R-meas                                          | 0.078 (1.037) <sup>x1</sup>                        |
| <b>Refinement</b>                               |                                                    |
| Resolution range (Å)                            | 44.68 - 2.04 (2.113 - 2.04) <sup>x2</sup>          |
| R-work                                          | 0.1962 (0.3045) <sup>x2</sup>                      |
| R-free                                          | 0.2369 (0.3529) <sup>x2</sup>                      |
| coordinate error (max.-likelihood based)        | 0.29                                               |
| Number of non-hydrogen atoms                    | 4413                                               |
| macromolecules                                  | 4179                                               |
| ligands                                         | 124                                                |
| water                                           | 110                                                |
| Protein residues                                | 542                                                |
| RMS (bonds)                                     | 0.008                                              |
| RMS (angles)                                    | 0.93                                               |
| Ramachandran favored (%)                        | 99                                                 |
| Ramachandran outliers (%)                       | 0.56                                               |
| Clashscore                                      | 4.08                                               |
| Average B-factor (Å <sup>2</sup> )              | 56.98                                              |
| macromolecules (Å <sup>2</sup> )                | 57.5                                               |
| ligands (Å <sup>2</sup> )                       | 48.49                                              |
| solvent (Å <sup>2</sup> )                       | 46.81                                              |
| Number of TLS groups                            | 33                                                 |

x1, x2 Statistics for the highest-resolution shell are shown in parentheses
